# Supplementary material for: Direct electrospinning construction of nanocables with electrical conductive-magnetic core and insulative-photoluminescent sheath
Source: Royal Society of Chemistry journal article supplement (doi:10.1039/c5ra16419b), 2015-01-01
Supplement: c5ra16419b1.pdf [file c5ra16419b1.pdf]

## Electronic Supplementary Information (ESI)

### Direct Electrospinning Construction of Nanocables with Electrical Conductive-Magnetic Core and Insulative- Photoluminescent Sheath

Lei Han, Qianli Ma, and Xiangting Dong\*

*Key Laboratory of Applied Chemistry and Nanotechnology at Universities of Jilin Province,*

*Changchun University of Science and Technology, Changchun 130022. Fax: 86 0431 85383815;*

*Tel: 86 0431 85582575; E-mail: dongxiangting888@163.com*

#### Morphologies of Fe<sub>3</sub>O<sub>4</sub> nanoparticles

As seen in Fig. S1a, the obtained Fe<sub>3</sub>O<sub>4</sub> nanoparticles before coating oleic acid are spherical in shape, and the particle size is *ca.* 10 nm. After being coated with oleic acid, as indicated in Fig. S1b, the morphology of Fe<sub>3</sub>O<sub>4</sub> nanoparticles barely changes, and the blurry coating layers can be observed outside the surface of each Fe<sub>3</sub>O<sub>4</sub> nanoparticle.

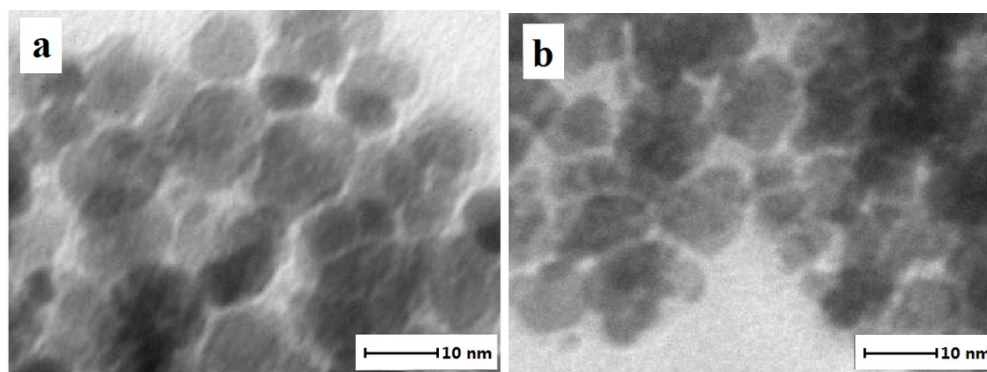

**Fig. S1** TEM images of Fe<sub>3</sub>O<sub>4</sub> nanoparticles before (a) and after (b) coating oleic acid

# **SEM and TEM images of all $[\text{Fe}_3\text{O}_4/\text{PANI}/\text{PVP}]@[\text{Eu}(\text{TTA})_3(\text{TPPO})_2/\text{PVP}]$ nanocables samples**

Fig. S2 shows the SEM and TEM images of all  $[\text{Fe}_3\text{O}_4/\text{PANI}/\text{PVP}]@[\text{Eu}(\text{TTA})_3(\text{TPPO})_2/\text{PVP}]$  nanocables samples. From the SEM observations, it can be seen that all these samples have similar morphologies, and their sizes have no great difference. As seen from the TEM images, one can see that the quantities of  $\text{Fe}_3\text{O}_4$  nanoparticles in the cores of these nanocables are different. With the adding more  $\text{Fe}_3\text{O}_4$  nanoparticles into the spinning solution I, the quantity of  $\text{Fe}_3\text{O}_4$  nanoparticles in the cores of nanocables is increased.

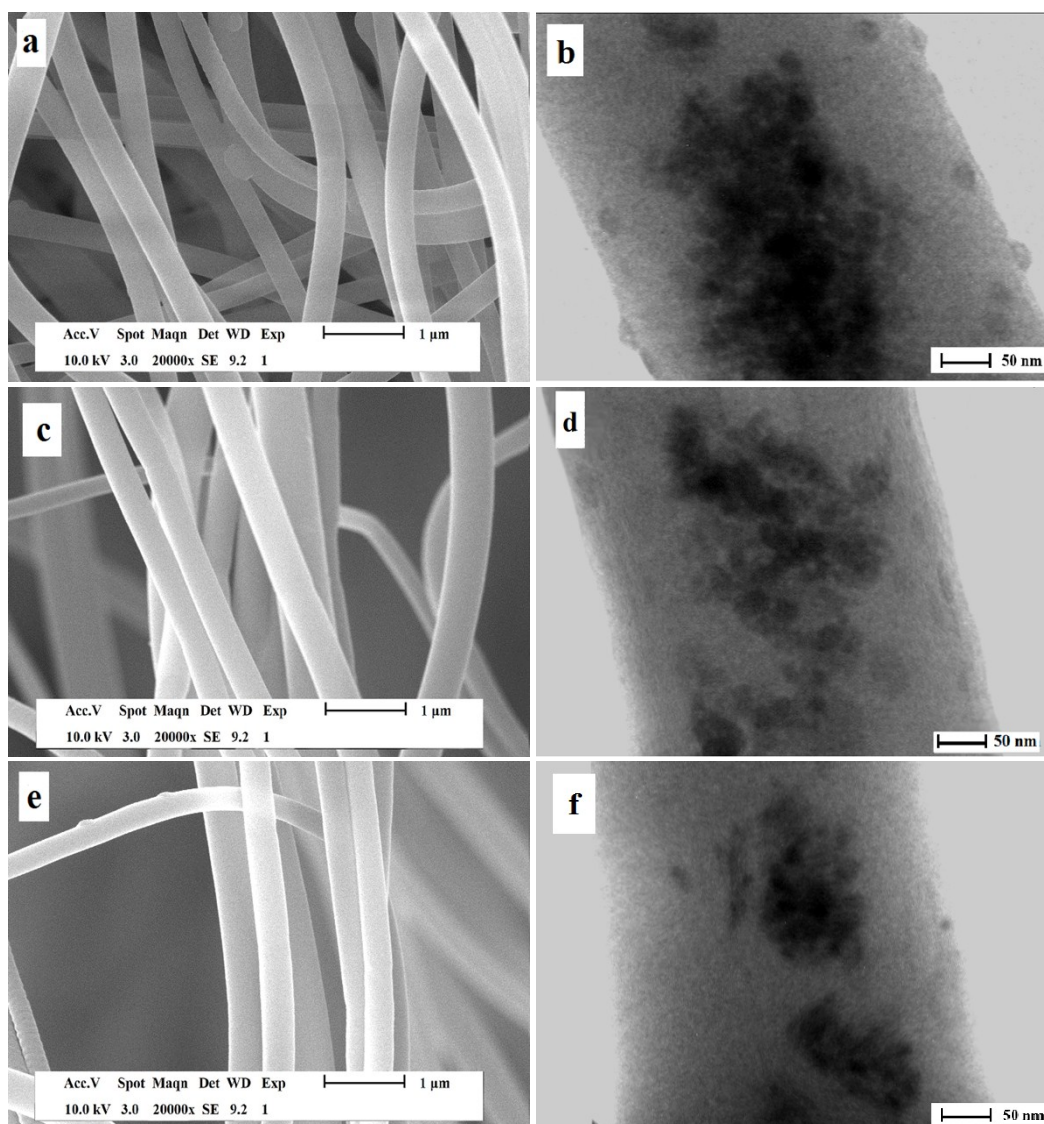

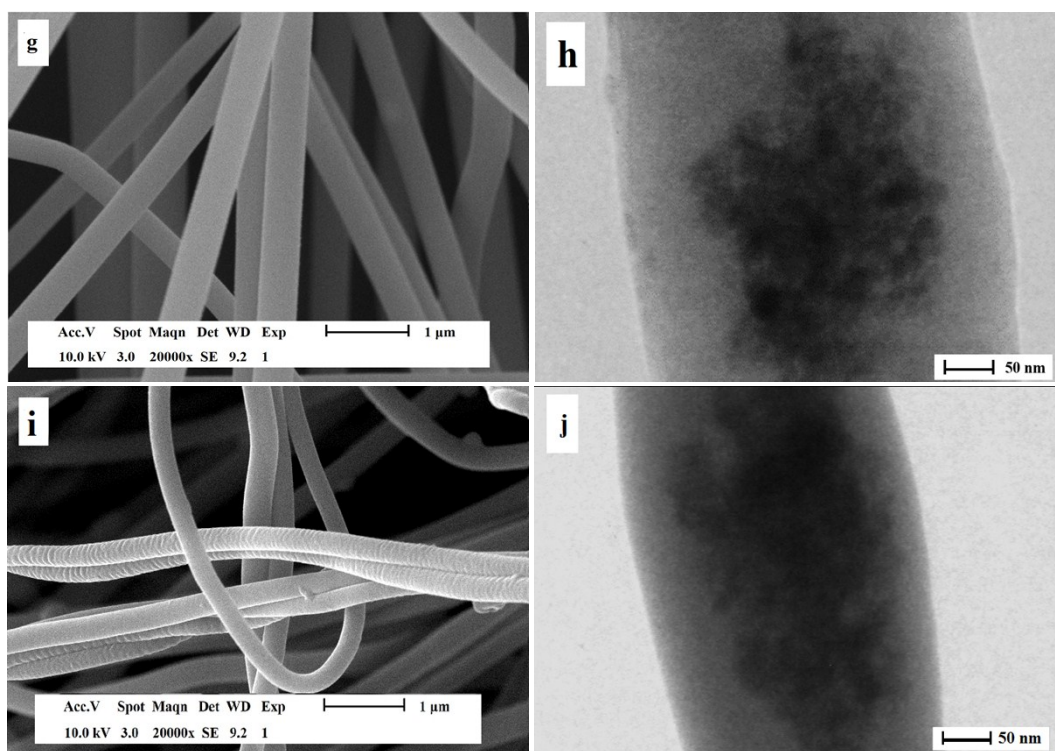

**Fig. S2** SEM and TEM images of all  $[\text{Fe}_3\text{O}_4/\text{PANI}/\text{PVP}][\text{Eu}(\text{TTA})_3(\text{TPPO})_2/\text{PVP}]$  nanocables samples: (a, b) S1@S6, (c, d)

S2@S6, (e, f) S3@S6, (g, h) S4@S6, (i, j) S5@S6
